# Supplementary material
Source: PubMed Central journal article supplement (PMC7218436)
Supplement: advancesADV2019001265-suppl1.pdf [file advancesADV2019001265-suppl1.pdf]

Supplemental Appendix

SUPPLEMENTAL FIGURE 1.

Overall survival comparison by size group with the cut-off value of 10 cm in (A) Mediastinal Bulk (MB)-type and in (B) Non-Bulky/Non-Mediastinal Bulk (NB/NMB)-type subgroup.

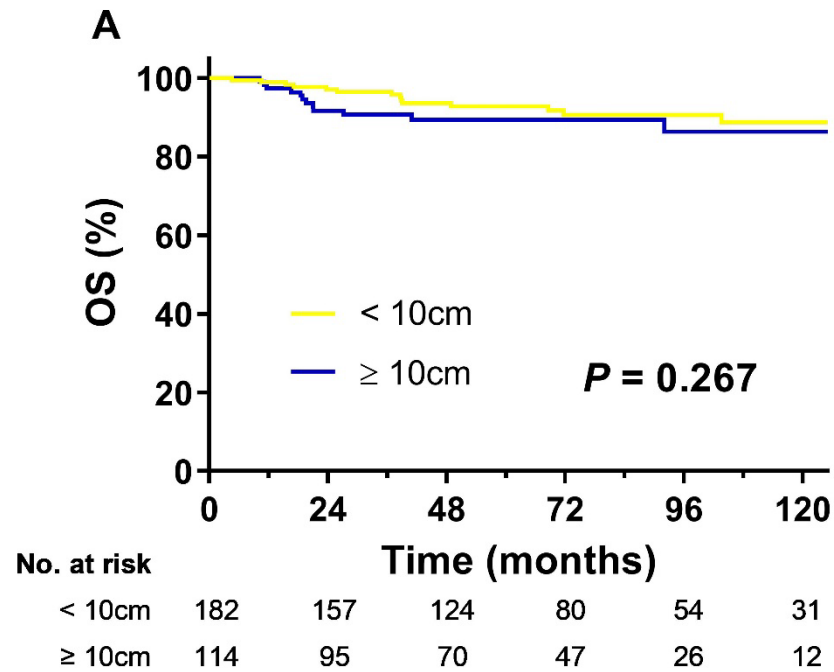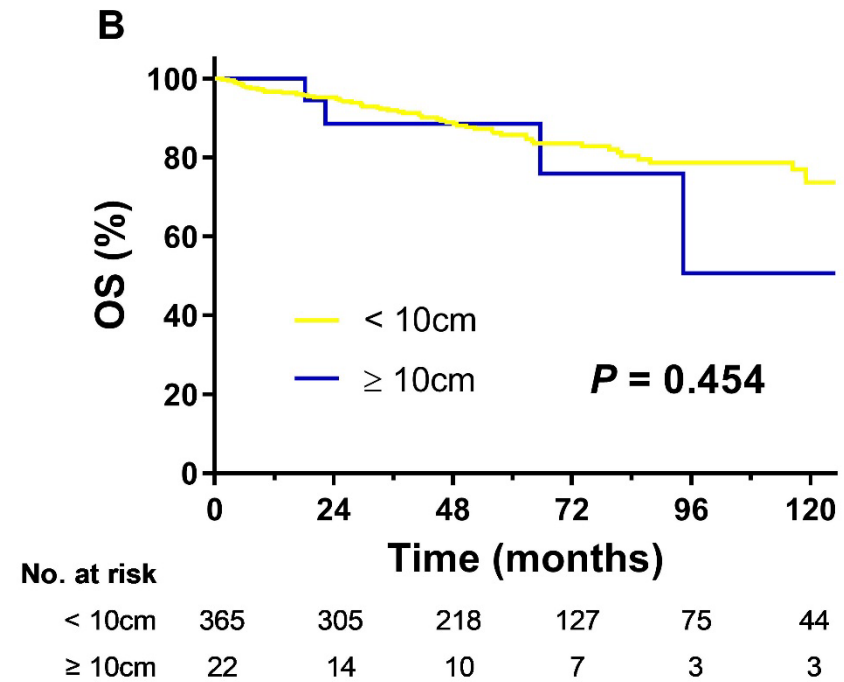

**Supplemental Table 1. treatment modality percentage among different chemotherapy response groups**

|                  | Chemotherapy (%) | CMT (%)    | p     |
|------------------|------------------|------------|-------|
| Evaluated by CT  |                  |            |       |
| CR/CRu           | 216 (82.1)       | 47 (17.8)  | 0.000 |
| PR               | 147 (64.8)       | 80 (35.2)  |       |
| SD               | 31 (79.5)        | 8 (20.5)   |       |
| PD               | 56 (96.6)        | 2 (3.4)    |       |
| Unknown/NA       | 83 (86.5)        | 13 (13.5)  |       |
| Evaluated by PET |                  |            |       |
| CR               | 400 (78.6)       | 109 (21.4) | 0.000 |
| PR               | 25 (61.6)        | 16 (39.0)  |       |
| SD               | 10 (83.3)        | 2 (16.7)   |       |
| PD               | 62 (98.4)        | 1 (1.6)    |       |
| Unknown/NA       | 36 (62.1)        | 22 (37.9)  |       |

Abbreviations: CR, complete remission; CRu, complete remission uncertain; PR, partial remission; SD, stable disease, PD, progressive disease; NA, information not available; CMT, combined modality treatment.

**Supplemental Table 2. Disease responses and 5-year survival rates (%)**

| Variable                     | MB         | NB/NMB     | P value |
|------------------------------|------------|------------|---------|
| Chemotherapy response by CT  |            |            |         |
| CR/CRu                       | 108 (34.1) | 248 (56.4) | 0.000   |
| PR                           | 131 (41.5) | 104 (23.6) |         |
| SD                           | 22 (7.0)   | 21 (4.8)   |         |
| PD                           | 32 (10.1)  | 42 (9.5)   |         |
| Unknown                      | 8(2.5)     | 25 (5.7)   |         |
| Chemotherapy response by PET |            |            |         |
| CR                           | 217 (72.1) | 298 (76.6) | 0.126   |
| PR                           | 26 (8.6)   | 15 (3.9)   |         |
| SD                           | 5 (1.7)    | 7 (1.8)    |         |
| PD                           | 26 (8.6)   | 37 (9.5)   |         |
| No PET                       | 27 (9.0)   | 32 (8.2)   |         |
| Relapse                      | 33 (14.6)  | 51 (16.3)  | 0.593   |
| 5-year OS                    | 91.9%      | 85.8%      | 0.006   |
| 5-year PFS                   | 73.7%      | 73.6%      | 0.547   |

Abbreviations: MB, mediastinal bulk-type; NB/NMB, Non-bulky/non-mediastinal bulk-type; CR, complete remission; PR, partial remission; SD, stable disease, PD, progressive disease; OS, overall survival; PFS, progression free survival.

**Supplemental Table 3. Univariable Analysis of PFS and OS at 5 Years**

| Variable                  | PFS              |       | OS               |       |
|---------------------------|------------------|-------|------------------|-------|
|                           | HR (95% CI)      | p     | HR (95% CI)      | p     |
| Dmax                      | 1.00 (0.96-1.05) | 0.832 | 0.97 (0.91-1.03) | 0.347 |
| Dmax (<5 vs. ≥5)          | 1.02 (0.75-1.38) | 0.908 | 0.64 (0.42-0.97) | 0.038 |
| Dmax in Mediastinum       | 1.00 (0.96-1.03) | 0.892 | 0.96 (0.90-1.01) | 0.101 |
| Type (MB vs. NB/NMB)      | 0.91 (0.67-1.23) | 0.547 | 0.53 (0.34-0.84) | 0.007 |
| Age                       | 1.01 (1.00-1.02) | 0.084 | 1.03 (1.02-1.04) | 0.000 |
| Age (<45 vs. ≥45)         | 1.23 (0.90-1.68) | 0.191 | 2.19 (1.44-3.33) | 0.000 |
| Age (<60 vs. ≥60)         | 1.50 (1.01-2.23) | 0.043 | 3.83 (2.46-5.96) | 0.000 |
| Gender                    | 1.11 (0.83-1.50) | 0.483 | 1.13 (0.74-1.72) | 0.563 |
| Pathology                 | 0.93 (0.83-1.05) | 0.243 | 1.06 (0.91-1.24) | 0.428 |
| BM involvement            | 1.02 (0.77-1.36) | 0.895 | 1.13 (0.77-1.66) | 0.537 |
| ECOG PS                   | 1.11 (0.90-1.38) | 0.324 | 1.92 (1.51-2.43) | 0.000 |
| ECOG PS (0 vs. 1 vs. ≥2)  | 1.16 (0.92-1.47) | 0.210 | 2.20 (1.62-2.99) | 0.000 |
| B symptom                 | 1.22 (0.92-1.62) | 0.157 | 1.40 (0.95-2.08) | 0.091 |
| Stage (III vs. IV)        | 0.90 (0.67-1.22) | 0.500 | 0.81 (0.53-1.23) | 0.322 |
| IPS                       | 1.14 (1.02-1.26) | 0.017 | 1.21 (1.04-1.40) | 0.011 |
| IPS (0-1 vs. 2-3 vs. 4-6) | 1.34 (1.08-1.67) | 0.009 | 1.35 (0.99-1.83) | 0.059 |

Abbreviations: Dmax, maximal diameter; MB, mediastinal bulk-type; NB/NMB, non-bulky/ non-mediastinal bulk-type; BM, bone marrow; ECOG, Eastern Cooperative Oncology Group; PS, performance status; IPS, International Prognostic Score.
